# Supplementary material for: The structure and amorphization of germanane
Source: Royal Society of Chemistry journal article supplement (doi:10.1039/c3tc32489c), 2014-01-01
Supplement: c3tc32489c1.pdf [file c3tc32489c1.pdf]

**Supporting information**

**The structure and amorphization of germanane**

Shishi Jiang, Elisabeth Bianco and Joshua E. Goldberger\*

Department of Chemistry and Biochemistry, The Ohio State University, Columbus, Ohio  
43210-1340, USA

Email: [goldberger@chemistry.ohio-state.edu](mailto:goldberger@chemistry.ohio-state.edu)

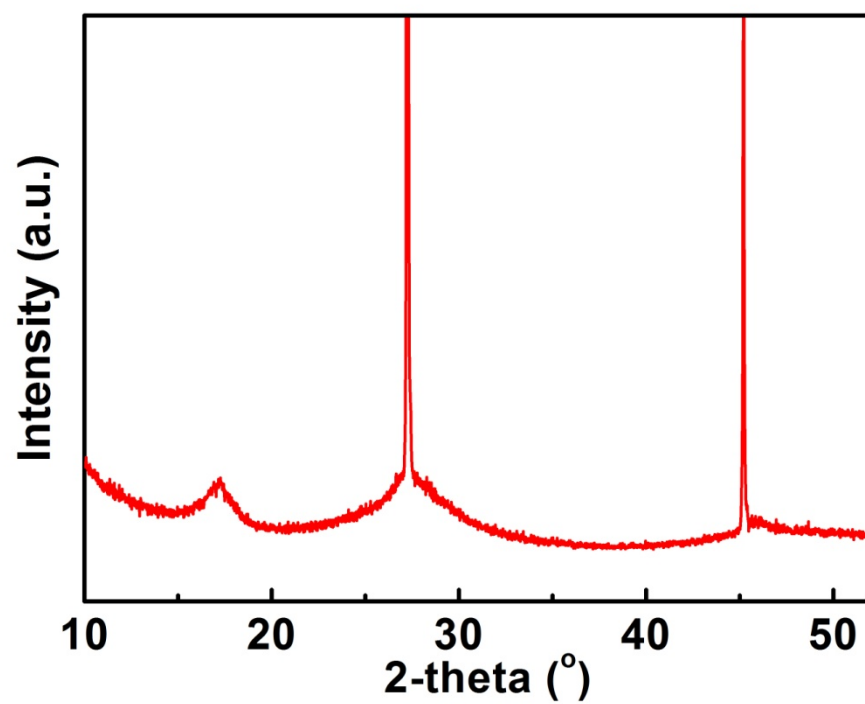

**Fig. S1** Flat plate XRD of germanane annealed at 175 °C.

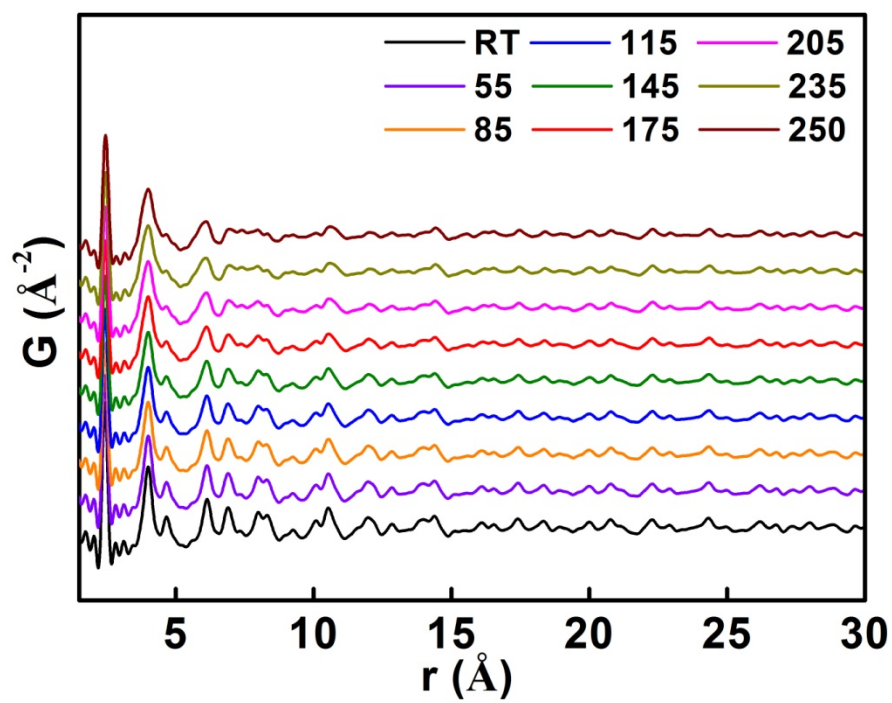

**Fig. S2** PDF of GeH at different temperatures with slight offset to show the features in PDF more clearly.

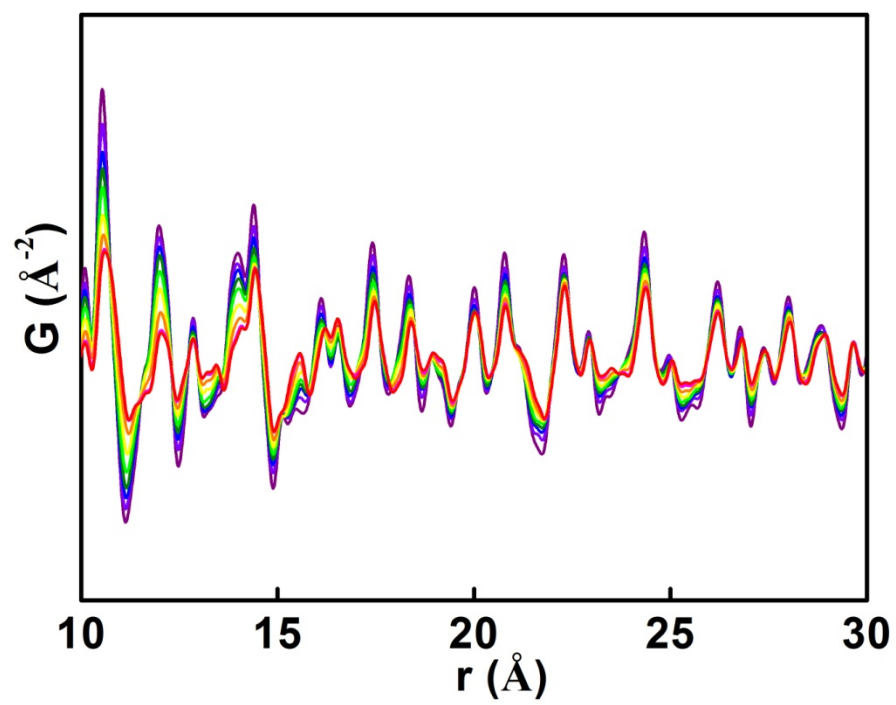

**Fig. S3** Superimposed PDF of GeH at different temperatures with at the range of 10-30  $\text{\AA}$ .

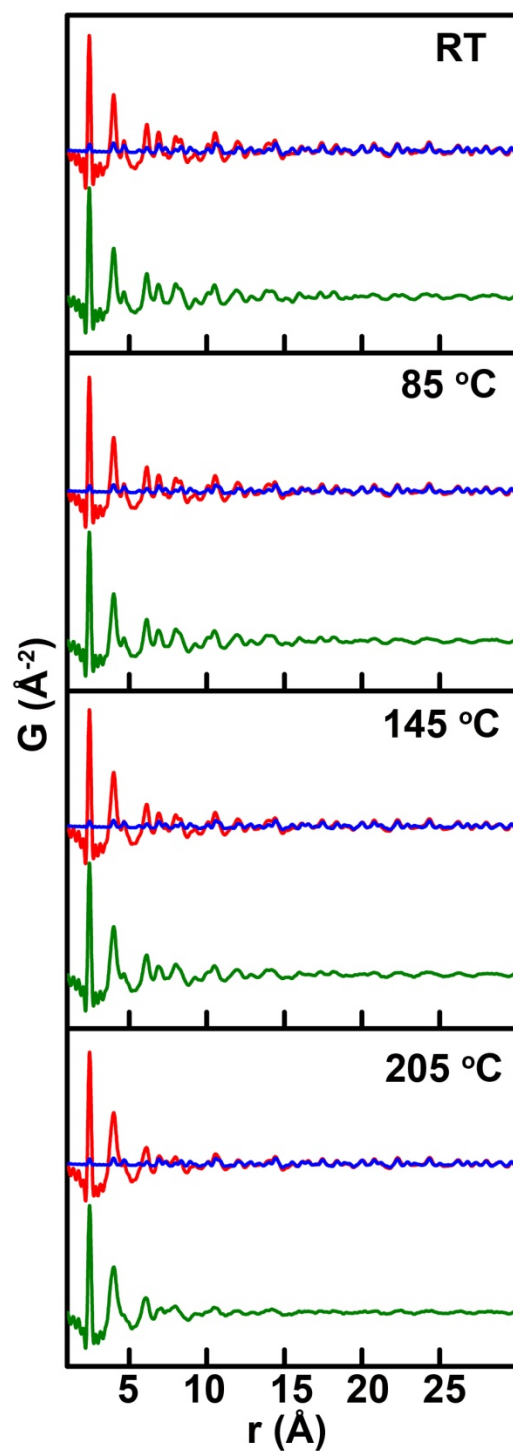

**Fig. S4** PDF of GeH (red) at different temperatures with scaled PDF of Ge (blue) that match the intensity of the high- $r$  features above 28  $\text{\AA}$ . The difference curves (green) of them are also plotted.

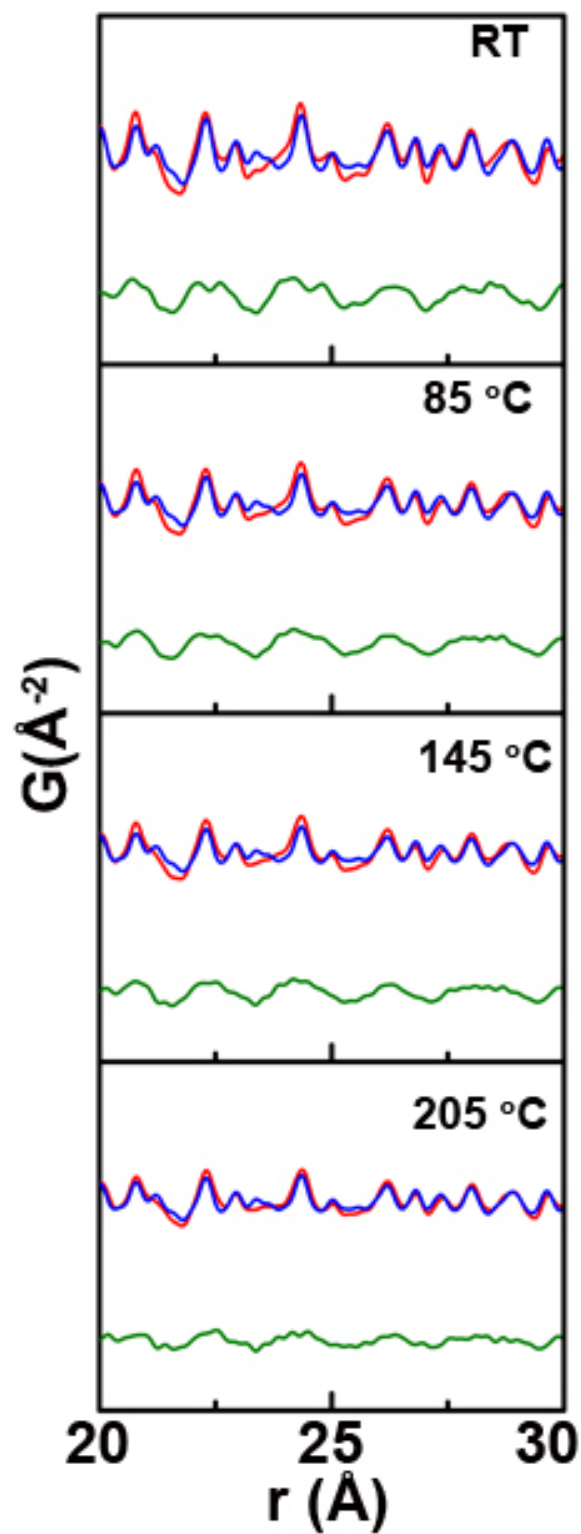

**Fig. S5** Zoom in at 20-30 Å of Fig. S4 data. The PDF of GeH (red) at different temperatures with scaled PDF of Ge (blue) that match the intensity of the high- $r$  features above 28 Å. The difference curves (green) of them are also plotted.

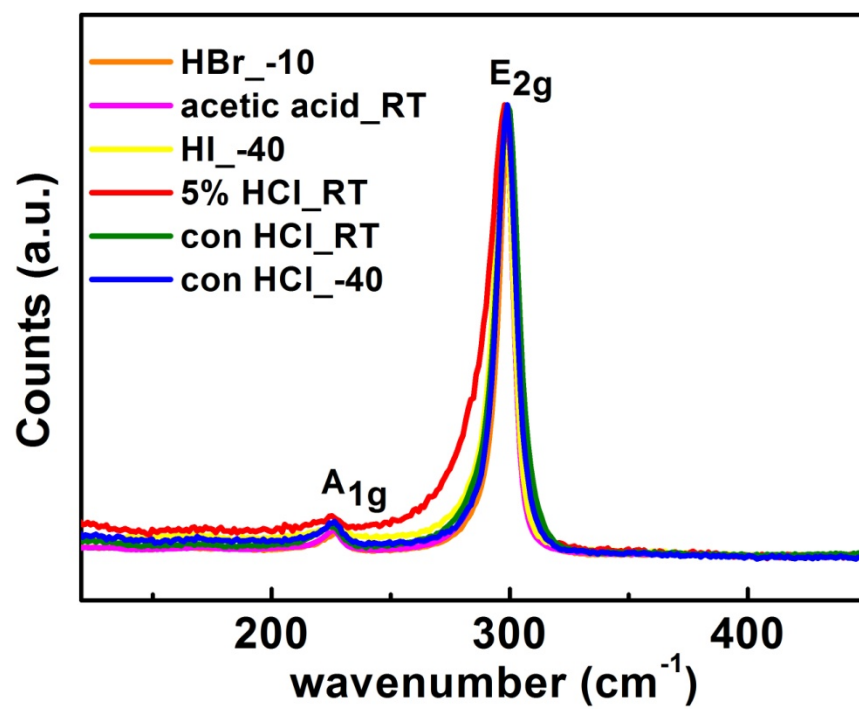

**Fig. S6** Raman spectra of different GeH samples synthesized with various acids, under different conditions.

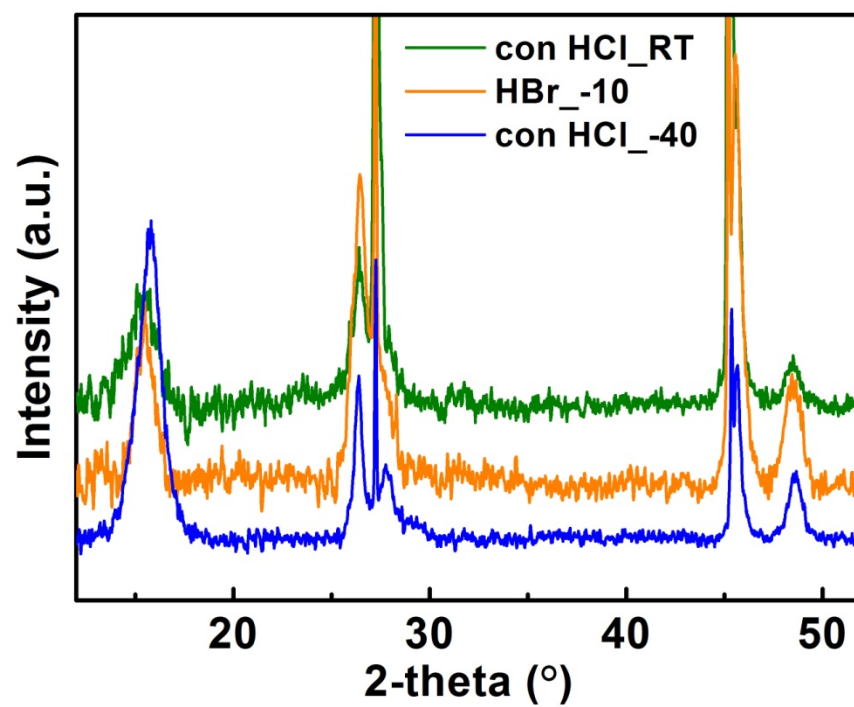

**Fig. S7** XRD of different GeH samples synthesized with various acids, under different conditions.
